# Supplementary material for: Encapsulation of multiple enzymes in a metal–organic framework with enhanced electro-enzymatic reduction of CO2 to methanol
Source: Royal Society of Chemistry journal article supplement (doi:10.1039/d1gc00241d), 2021-01-01
Supplement: d1gc00241d1.pdf [file d1gc00241d1.pdf]

# Encapsulation of Multiple Enzymes in Metal-Organic Framework with Enhanced Electro-enzymatic Reduction of CO<sub>2</sub> to Methanol

Zhibo Zhang,<sup>a</sup> Jiajia Li,<sup>a</sup> Mingbo Ji,<sup>c</sup> Yanrong Liu,<sup>a</sup> Wang Nan,<sup>a</sup> Xiangping Zhang,<sup>b</sup> Suojiang Zhang,<sup>b\*</sup> and Xiaoyan Ji<sup>a\*</sup>

<sup>a</sup>Energy Engineering, Division of Energy Science, Luleå University of Technology, 97187, Luleå, Sweden

<sup>b</sup>CAS Key Laboratory of Green Process and Engineering, Beijing Key Laboratory of Ionic Liquids Clean Process, State Key Laboratory of Multiphase Complex Systems, Institute of Process Engineering, Chinese Academy of Sciences, 100190, Beijing, PR China

<sup>c</sup>Process and Systems Engineering Center (PROSYS), Department of Chemical and Biochemical Engineering, Søtofts Plads, Building 229, Technical University of Denmark, DK-2800 Lyngby, Denmark

Corresponding authors: Xiaoyan Ji ([xiaoyan.ji@ltu.se](mailto:xiaoyan.ji@ltu.se)); Suojiang Zhang ([sjzhang@ipe.ac.cn](mailto:sjzhang@ipe.ac.cn))

Table S1. Kinetic parameters of enzymes for different reaction<sup>1</sup>

| Enzyme                     | Reaction                  | <i>K<sub>m</sub></i> (mM) | <i>V<sub>max</sub></i> (mM min <sup>-1</sup> ) |
|----------------------------|---------------------------|---------------------------|------------------------------------------------|
| Formate dehydrogenase      | CO <sub>2</sub> → HCOOH   | 30-50                     | 0.002                                          |
|                            | HCOOH → CO <sub>2</sub>   | 3.3                       | 0.02                                           |
| Formaldehyde dehydrogenase | HCOOH → HCHO              | NA                        | NA                                             |
|                            | HCHO → HCOOH              | 0.06                      | 0.01                                           |
| Alcohol dehydrogenase      | HCHO → CH <sub>3</sub> OH | 17.5                      | 0.3                                            |
|                            | CH <sub>3</sub> OH → HCHO | 275                       | 0.5 × 10 <sup>-3</sup>                         |

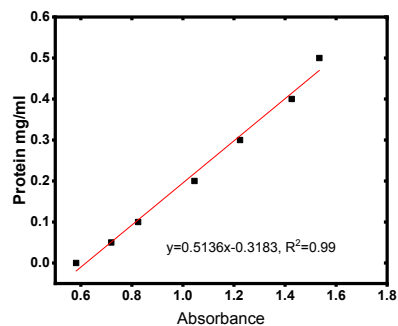

Figure S1. Standard calibration curve of protein in Tris-HCl buffer using Bradford assay method.

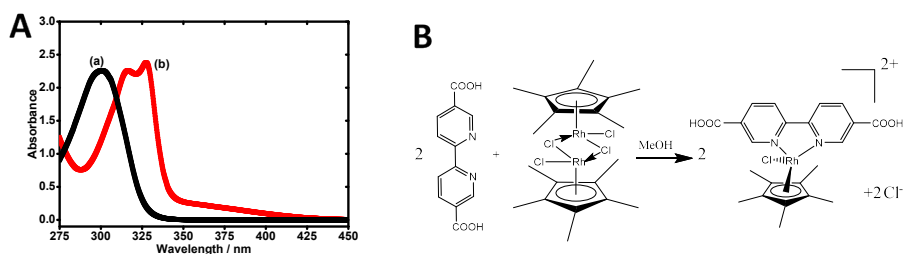

Figure S2. (A) UV-vis absorption spectra of (a) 2,2'-bipyridyl-5,5'-dicarboxylic acid and (b) complexation of carboxylic pyridine with  $(\text{RhCp}^*\text{Cl}_2)_2$ . (B) Corresponding illustration of the complexation process

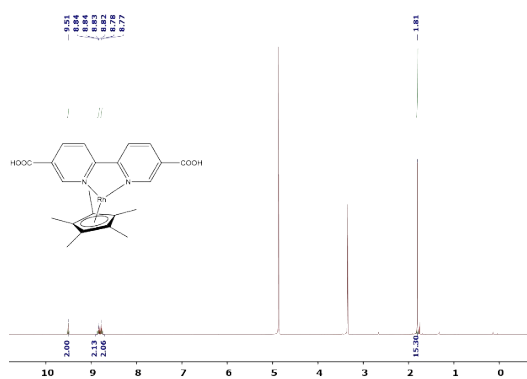

Figure S3. NMR of Rh complex  $\text{Cp}^*\text{Rh}(2,2'\text{-bipyridyl-5,5'}\text{-dicarboxylic acid})\text{Cl}_2$  compound.  $^1\text{H}$  NMR (600 MHz, methanol- $d_4$ ):  $\delta = 9.51(\text{s}, 2\text{H}), 8.87\text{-}8.81(\text{m}, 2\text{H}), 8.78(\text{d}, J=8.4\text{ Hz}, 2\text{H}), 1.81(\text{s}, 15\text{H})$ .

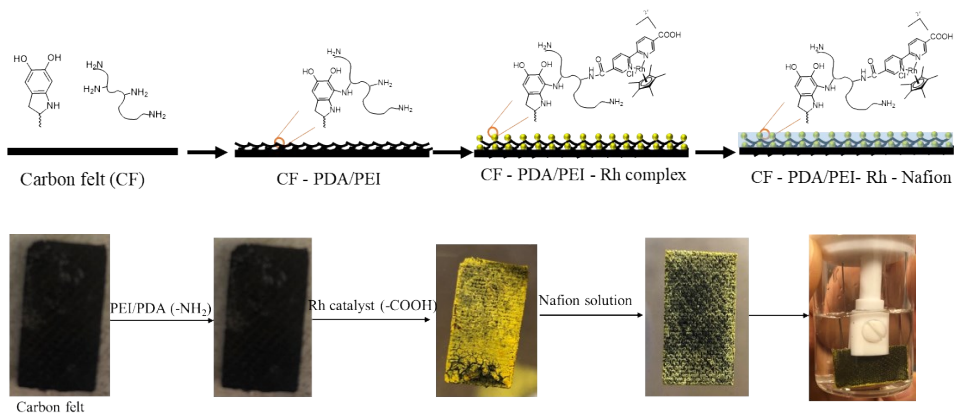

Figure S4 The fabrication process of the Rh complex-grafted electrode.

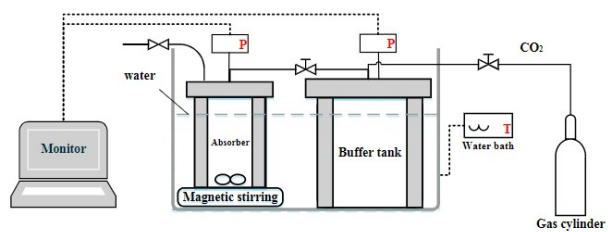

Figure S5. Schematic diagram of the CO<sub>2</sub> solubility apparatus<sup>2</sup>

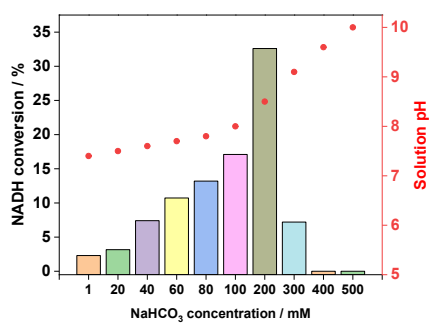

Figure S6. effect of NaHCO<sub>3</sub> concentration on NADH conversion.

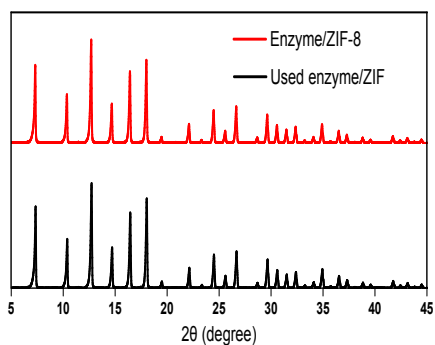

Figure S7. XRD patterns of enzymes/ZIF-8 composite and used enzymes/ZIF-8 composite in Tirs-HCl buffer.

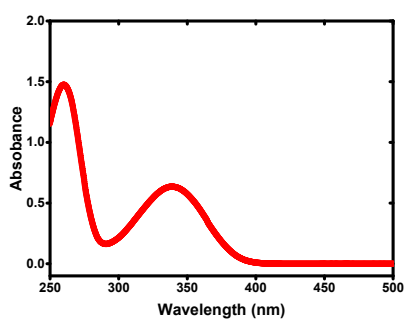

Figure S8. UV spectrum during reduction of  $\text{NAD}^+$  to NADH.

1. J. Luo, A. S. Meyer, R. V. Mateiu and M. Pinelo, *New Biotechnology*, 2015, **32**, 319-327.
2. C. Y. Ma, S. Sarmad, J. P. Mikkola and X. Y. Ji, *Proceedings of the 9th International Conference on Applied Energy*, 2017, **142**, 3320-3325.
